# Supplementary material for: A Survey of Current Resources to Study lncRNA-protein Interactions.
Source: Preprints.org preprint supplement (doi:10.20944/preprints202105.0240.v1), 2021-05-11
Supplement: Supplementary file 3 [file supplementary]

## Sheet: lncRNA - Protein Databases
	lncRNA - Protein Databases
	Database names	Information type	Information available	Species	Last updated	Links	Citation
1	ENCORI (starBase)	Interaction	RNA-RNA, RNA-protein	23	2020	http://starbase.sysu.edu.cn/	[37]
2	POSTAR	RNA-protein binding motifs	RNA-protein	6	2018	http://POSTAR.ncrnalab.org	[38]
3	RAIN	Interaction	RNA-RNA, RNA-protein	4	2017	https://rth.dk/resources/rain/	[39]
4	RNAInter	Interaction	RNA-RNA, RNA-protein, RNA-DNA	154	2020	https://www.rna-society.org/rnainter/	[40]
5	NPInter	Interaction	RNA-RNA, DNA-DNA, DNA-RNA, RNA-protein, DNA-protein	34	2019	http://bigdata.ibp.ac.cn/npinter4	[41]
6	ATtRACT	RNA-protein binding motifs	RNA-protein	24	2016	http://attract.cnic.es	[42]
7	oRNAment	RNA-protein binding motifs	RNA-protein	5	2019	http://rnabiology.ircm.qc.ca/oRNAment/	[43]
